# Supplementary material for: Common ALS/FTD risk variants in UNC13A exacerbate its cryptic splicing and loss upon TDP-43 mislocalization
Source: Research Square preprint supplement (doi:10.21203/rs.3.rs-386600/v1), 2021-04-19
Supplement: Supplementary file 4 [file de0037b4bbd990b761821c22.xlsx]

## Sheet: Sheet1
	ITC	9-11/3/21		TDP-43 + Healthy and Risky RNA				Fitted offset used.					AVERAGES OF 4 EXPERIMENTS
								Measured HoD in agreement with values used.
HEALTHY						RISKY							HEALTHY
20210309_TDP43v2(12)+HealthyRNAv2(120)_25C_1						20210309_TDP43v2(12)+RiskyRNAv2(120)_25C							Kd (nM)	N	DH	DG	-TDS
Model: One Set of Sites						Model: One Set of Sites
[Cell] (M) = 12.0e-6						[Cell] (M) = 12.0e-6							39.3	0.923	-39	-10.1	28.9
[Syr] (M) = 120e-6						[Syr] (M) = 120e-6							42	0.903	-36.8	-10.1	26.7
N (sites) = 0.923 ± 2.3e-3						N (sites) = 0.883 ± 3.6e-3							62.7	0.888	-36.9	-9.83	27.1
KD (M) = 39.3e-9 ± 3.00e-9						KD (M) = 59.5e-9 ± 6.15e-9							49.3	0.835	-36.2	-9.97	26.2
∆H (kcal/mol) = -39.0 ± 0.237						∆H (kcal/mol) = -34.0 ± 0.313
Offset (kcal/mol) = 3.79 ± 0.147						Offset (kcal/mol) = 3.79 ± 0.184						ave	48.325	0.88725	-37.225	-10	27.225
∆G (kcal/mol) = -10.1						∆G (kcal/mol) = -9.86						stdev	10.4729	0.0376685	1.22304	0.128841	1.1758
-T∆S (kcal/mol) = 28.9						-T∆S (kcal/mol) = 24.2
													48 +- 10 nM	0.89 +- 0.04	-37.2 +- 1.2 kcal/mol	-10.0 +- 0.1 kcal/mol	27.2 +- 1.2 kcal/mol
20210310_TDP-43-LC(9.6)+HealthyRNAv2(96)_25C_1						20210310_TDP-43-LC(9.6)+RiskyRNAv2(96)_25C_1
Model: One Set of Sites						Model: One Set of Sites
[Cell] (M) = 9.60e-6						[Cell] (M) = 9.60e-6							RISKY
[Syr] (M) = 96.0e-6						[Syr] (M) = 96.0e-6
N (sites) = 0.903 ± 1.6e-3						N (sites) = 0.842 ± 3.9e-3							Kd (nM)	N	DH	DG	-TDS
KD (M) = 42.0e-9 ± 1.95e-9						KD (M) = 79.3e-9 ± 7.15e-9
∆H (kcal/mol) = -36.8 ± 0.147						∆H (kcal/mol) = -33.8 ± 0.322							59.5	0.883	-34	-9.86	24.2
Offset (kcal/mol) = 2.49 ± 8.9e-2						Offset (kcal/mol) = 3.25 ± 0.177							79.3	0.842	-33.8	-9.69	24.1
∆G (kcal/mol) = -10.1						∆G (kcal/mol) = -9.69							75.6	0.819	-33	-9.72	23.3
-T∆S (kcal/mol) = 26.7						-T∆S (kcal/mol) = 24.1							97	0.763	-34.1	-9.57	24.5
20210311_TDP43-LC(9.6)+HealthyRNAv2(96)_25C_1						20210311_TDP43-LC(9.6)+RiskyRNAv2(96)_25C_1						ave	77.85	0.82675	-33.725	-9.71	24.025
Model: One Set of Sites						Model: One Set of Sites						stdev	15.3906	0.0500691	0.499166	0.119164	0.512348
[Cell] (M) = 9.60e-6						[Cell] (M) = 9.60e-6
[Syr] (M) = 96.0e-6						[Syr] (M) = 96.0e-6							78 +- 15 nM	0.83 +- 0.05	-33.7 +- 0.5 kcal/mol	-9.7 +- 0.1 kcal/mol	24.0 +- 05 kcal/mol
N (sites) = 0.888 ± 2.2e-3						N (sites) = 0.819 ± 4.0e-3
KD (M) = 62.7e-9 ± 3.49e-9						KD (M) = 75.6e-9 ± 7.17e-9
∆H (kcal/mol) = -36.9 ± 0.201						∆H (kcal/mol) = -33.0 ± 0.325
Offset (kcal/mol) = 2.45 ± 0.117						Offset (kcal/mol) = 3.09 ± 0.175
∆G (kcal/mol) = -9.83						∆G (kcal/mol) = -9.72
-T∆S (kcal/mol) = 27.1						-T∆S (kcal/mol) = 23.3
20210311_TDP43-LC(9.6)+HealthyRNAv2(96)_25C_2						20210311_TDP43-LC(9.6)+RiskyRNAv2(96)_25C_2
Model: One Set of Sites						Model: One Set of Sites
[Cell] (M) = 9.60e-6						[Cell] (M) = 9.60e-6
[Syr] (M) = 96.0e-6						[Syr] (M) = 96.0e-6
N (sites) = 0.835 ± 2.9e-3						N (sites) = 0.763 ± 3.5e-3
KD (M) = 49.3e-9 ± 4.14e-9						KD (M) = 97.0e-9 ± 7.58e-9
∆H (kcal/mol) = -36.2 ± 0.274						∆H (kcal/mol) = -34.1 ± 0.300
Offset (kcal/mol) = 2.28 ± 0.155						Offset (kcal/mol) = 3.23 ± 0.149
∆G (kcal/mol) = -9.97						∆G (kcal/mol) = -9.57
-T∆S (kcal/mol) = 26.2						-T∆S (kcal/mol) = 24.5
